# Supplementary material for: The development of QUADAS: a tool for the quality assessment of studies of diagnostic accuracy included in systematic reviews
Source: Springer Nature journal article supplement (doi:10.1186/1471-2288-3-25), 2003-11-10
Supplement: Additional file 1 [file 1471-2288-3-25-s1.doc]

**Table 1 - Initial list of items together with review evidence**

| **Item (QUADAS item number (Table 2) to which each item refers)** | Evidence (Review) | | | |
| --- | --- | --- | --- | --- |
| 1 | | | 2 |
| E | T | A |  |
| **Category 1: Spectrum composition** | | | | |
| Was the spectrum of patients described in the paper and was it chosen adequately? (1) | 14 | 0 | 1 | II |
| Were selection criteria described clearly? (2) | na | na | na | IV |
| Was the method of population recruitment consecutive? (1) | 3 | 0 | 2 | II |
| Was the setting of the study relevant? (1) | 8 | 1 | 0 | IV |
| Was disease prevalence and severity reported? (not included in QUADAS) |
| **Category 2a: Index test and reference standard: Selection and execution** | | | | |
| In light of current technology, was the reference standard chosen appropriate to verify test results? (3) | 4 | 4 | 0 | II |
| Is it possible that a change in the technology of the index test has occurred since this paper was published? (not included in QUADAS) | 1 | 0 | 1 | IV |
| Was there an abnormally long time period between the performance of the test under evaluation and the confirmation of the diagnosis with the reference standard? (4) | 0 | 0 | 1 | IV |
| Was the execution of the index test described in sufficient detail to permit replication of the test? (8) | 1 | 0 | 1 | III |
| Was the execution of the reference standard described in sufficient detail to permit replication of the test? (9) | IV |
| Did the whole sample, or a random selection of the sample, receive verification using a reference standard of diagnosis? (5) | 17 | 3 | 3 | II |
| Did all patients receive the same reference standard regardless of the index test result? (6) | 2 | 0 | 0 |
| Were the results of the index test incorporated in the results of the reference standard? (7) | 0 | 0 | 0 | IV |
| Was the cut-off value pre-specified or acceptable in light of previous research? (not included in QUADAS) | na | na | na | III |
| Was treatment started based on the knowledge of the index test results before the reference standard was applied? (not included in QUADAS) | 0 | 0 | 0 | IV |

See end of table for legend

Table 1 (continued) - Initial list of items together with review evidence

| **Category 2b: Index test and reference standard: Interpretation** | | | | |
| --- | --- | --- | --- | --- |
| Were the index test results interpreted blind to the results of the reference standard? (10) | 4 | 0 | 1 | I |
| Were the reference standard results interpreted blind to the results of the index test? (11) |
| Was clinical data available when test results were interpreted? (12) | 7 | 0 | 1 | IV |
| Is data presented on observer or instrument variation that could have affected the estimates of test performance? (not included in QUADAS) | 8 | 0 | 0 | III |
| **Category 3: Analysis** | | | | |
| Were appropriate results presented (sensitivity, specificity, likelihood ratios, diagnostic odds ratios, predictive values) and were these calculated appropriately? (not included in QUADAS) | na | na | na | III |
| Was a measure of precision of the results presented (confidence intervals, standard errors)? (not included in QUADAS) | 0 | 0 | 0 | IV |
| Were uninterpretable/indeterminate/ intermediate results reported and included in the results? (13) | 0 | 0 | 2 | IV |
| Was the threshold value specified retrospectively based on analysis of the results? (not included in QUADAS) | 0 | 0 | 0 | IV |
| Were reasons for drop-out from the study reported? (14) | 0 | 0 | 0 | IV |
| Were subgroup analyses pre-specified and clinically relevant? (not included in QUADAS) | na | na | na | IV |
| Were results presented in a 2 x 2 data table? (not included in QUADAS) | na | na | na | IV |
| Was any indication of the utility of the test provided? (not included in QUADAS) | na | na | na | IV |
| **Category 4: Research Planning** | | | | |
| Was an appropriate sample size calculation performed and were sufficient patients included in the study? (not included in QUADAS) | na | | | III |
| Were study objectives clearly reported? (not included in QUADAS) | na | | | IV |
| Was there any evidence that a study protocol had been developed before the study was started? (not included in QUADAS) | na | | | IV |

1: Review of methodological literature on diagnostic test assessment

The number of studies providing evidence of each source of bias were summarised as follows:

E = empirical evidence of bias; T= theoretical evidence of bias; A= absence of bias

na= not available

2: Review of tools used to assess the quality of diagnostic tests

The proportion of tools covering each item were classified as follows:

I: 75-100%; II: 50-74%; III: 25-49%; IV: 0-24%
